# Supplementary material
Source: PubMed Central journal article supplement (PMC3143607)

Figure S1.

### HSQC of His<sub>6</sub>-Est3p

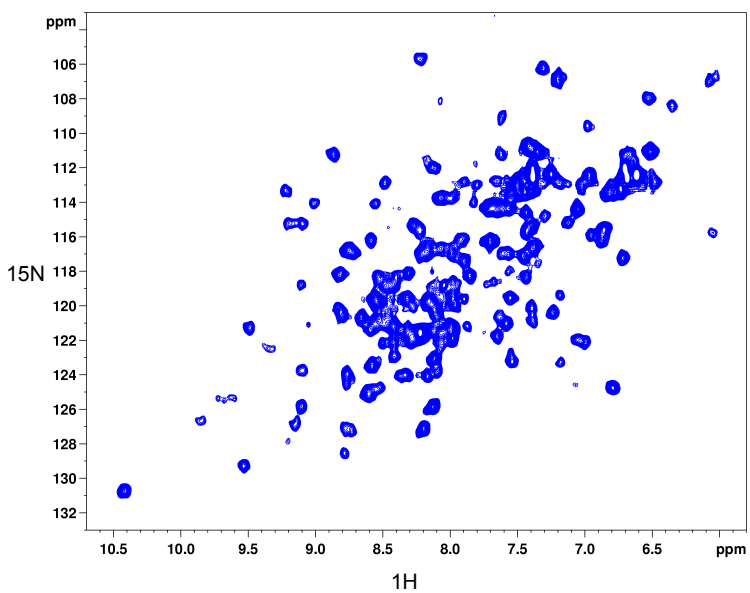

Supplement: supp_M111.228635_jbc.M111.228635-3.pdf [file supp_M111.228635_jbc.M111.228635-3.pdf]

Figure S2.

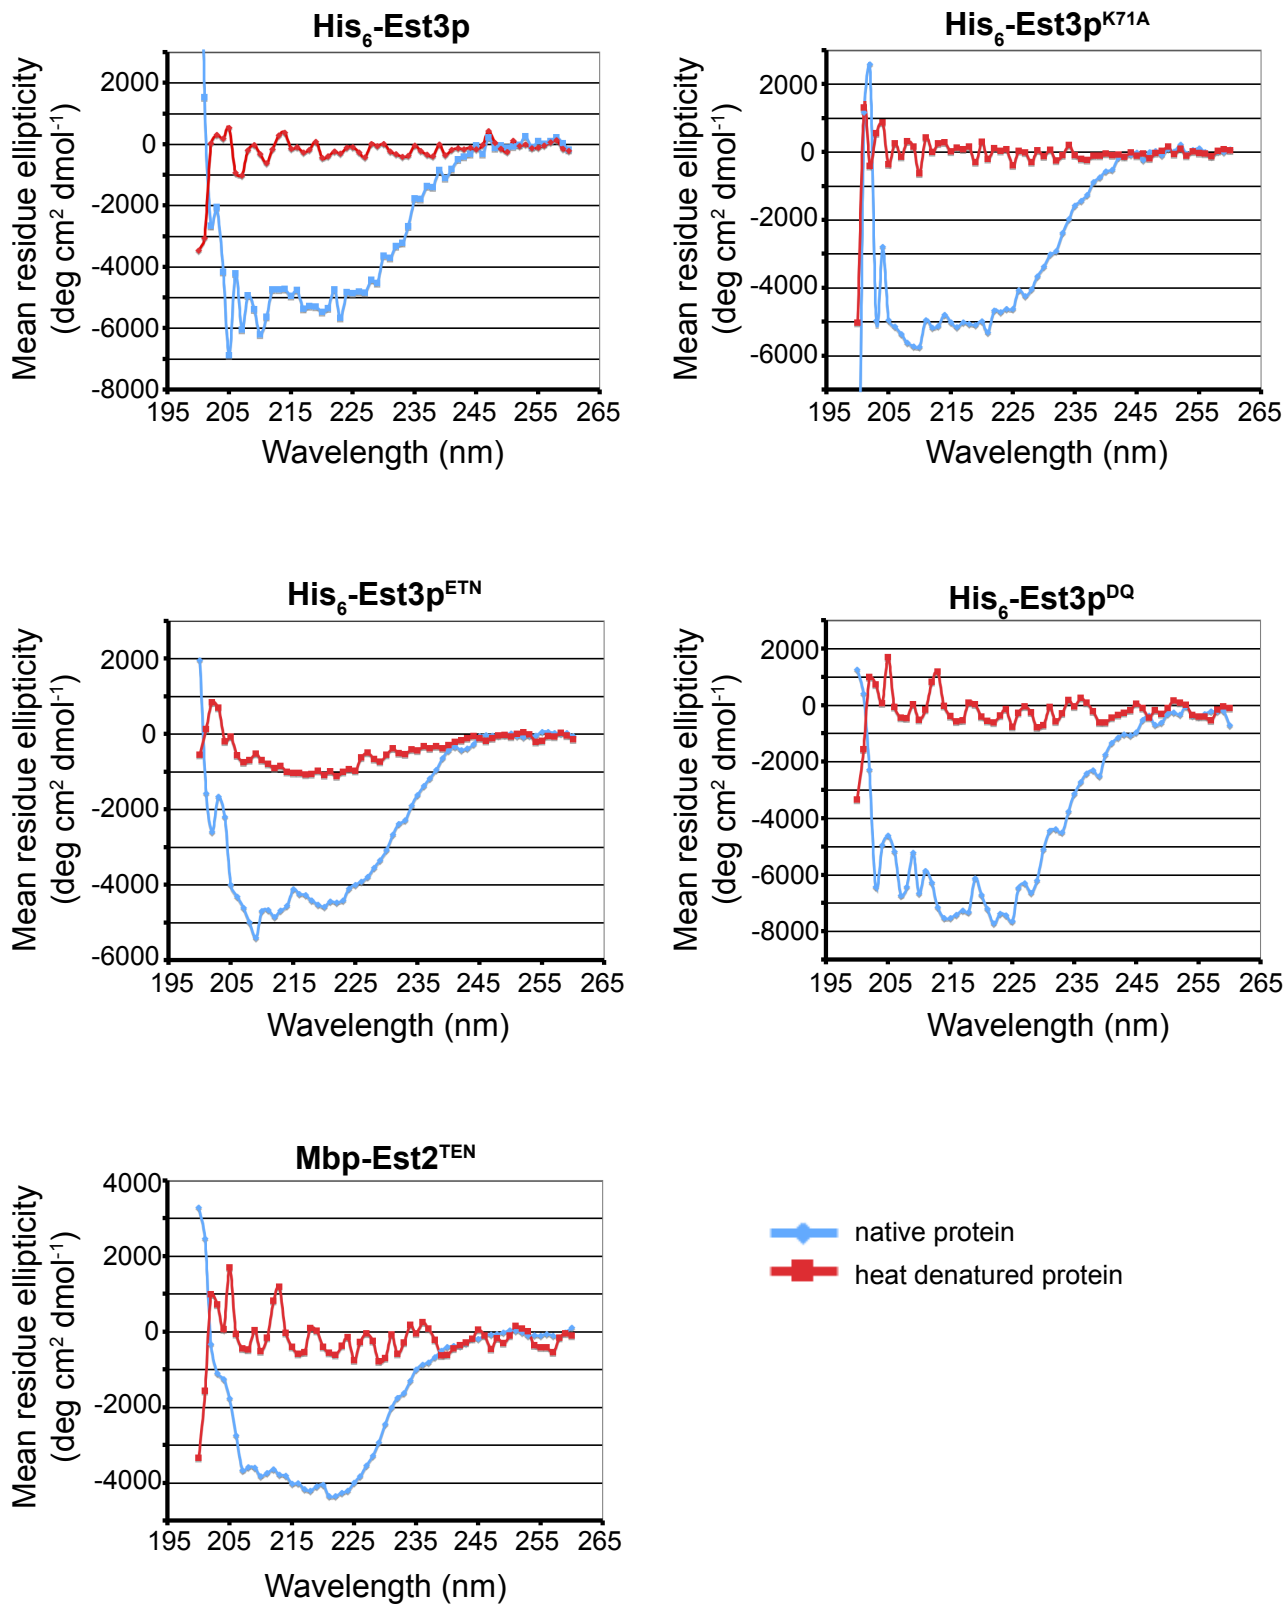

Supplement: supp_M111.228635_jbc.M111.228635-4.pdf [file supp_M111.228635_jbc.M111.228635-4.pdf]
